# Supplementary material for: The Effect of a Ketogenic Low-Carbohydrate, High-Fat Diet on Aerobic Capacity and Exercise Performance in Endurance Athletes: A Systematic Review and Meta-Analysis
Source: MDPI journal article supplement (doi:10.3390/nu13082896), 2021-08-23
Supplement: s1 [file s1]

**Table S1.** AMSTAR checklist items for each systematic review

| AMSTAR Item /<br>Systematic Review         | Burke<br>2020.08 | Burke<br>2020.06 | Burke<br>2017 | Cipyan<br>2018 | Dostal<br>2019 | Fleming<br>2003 | Heathery<br>2018 | Lambert<br>1994 | Prins<br>2019 | Shaw.<br>2019 |
|--------------------------------------------|------------------|------------------|---------------|----------------|----------------|-----------------|------------------|-----------------|---------------|---------------|
| 1. A prior design                          | Yes              | Yes              | Yes           | Yes            | Yes            | Yes             | Yes              | Yes             | Yes           | Yes           |
| 2. Duplicate selection and data extraction | Yes              | Yes              | Yes           | Yes            | Yes            | Yes             | Yes              | Yes             | Yes           | Yes           |
| 3. Comprehensive search                    | Yes              | Yes              | Yes           | Yes            | Yes            | Yes             | Yes              | Yes             | Yes           | Yes           |
| 4. Gray literature search                  | No               | No               | No            | No             | No             | No              | No               | No              | No            | No            |
| 5. List if included and excluded studies   | Yes              | Yes              | Yes           | Yes            | Yes            | Yes             | Yes              | Yes             | Yes           | Yes           |
| 6. Characteristics of studies              | Yes              | Yes              | Yes           | Yes            | Yes            | Yes             | Yes              | Yes             | Yes           | Yes           |
| 7. Scientific quality assessed             | Yes              | Yes              | Yes           | Yes            | Yes            | Yes             | Yes              | Yes             | Yes           | Yes           |
| 8. Scientific quality in conclusions       | Yes              | Yes              | Yes           | Yes            | Yes            | Yes             | Yes              | Yes             | Yes           | Yes           |
| 9. Methods to combine studies              | Yes              | Yes              | Yes           | Yes            | Yes            | Yes             | Yes              | Yes             | Yes           | Yes           |
| 10. Publication bias assessment            | No               | No               | No            | No             | No             | No              | No               | No              | No            | No            |
| 11. Conflict of interest                   | Yes              | Yes              | Yes           | Yes            | Yes            | Yes             | Yes              | Yes             | Yes           | Yes           |

*Abbreviations:* AMSTAR, A MeaSurement Tool to Assess Systematic Reviews; CA: cannot answer; NA: not applicable

**Table S2.** Search strategy used in each database

|                  |                                                                                                                                                                                                                                                                                     |
|------------------|-------------------------------------------------------------------------------------------------------------------------------------------------------------------------------------------------------------------------------------------------------------------------------------|
| PubMed           | #1 low carbohydrate high fat diet [Title] OR ketogenic diet [Title]<br>#2 (((exercise [Title] OR training [Title]) OR HIIT[Title]) OR VO2max [Title]) OR aerobic capacity [Title]) OR respiration [Title]<br>#3 #1 and #2                                                           |
| Web of Science   | #1 TITLE: (low carbohydrate high fat diet) OR TITLE: (ketogenic diet)<br>#2 TITLE: (exercise) OR TITLE: (training) OR TITLE: (HIIT) OR TITLE: (VO2max) OR TITLE: (aerobic capacity) OR TITLE: (respiration)<br>#3 #1 and #2                                                         |
| Cochrane Library | #1 low carbohydrate high fat diet in Record Title OR ketogenic diet in Record Title<br>#2 exercise in Record Title OR training in Record Title OR HIIT in Record Title OR aerobic capacity in Record Title OR VO2max in Record Title OR respiration in Record Title<br>#3 #1 and #2 |
| Pro Quest        | #1 ti (low carbohydrate high fat diet) OR ti (ketogenic diet)<br>#2 ti (exercise) OR ti (training) OR ti (HIIT) OR ti (aerobic capacity) OR ti (VO2max) OR ti (respiration)<br>#3 #1 and #2                                                                                         |
| Science Direct   | #1 low carbohydrate                                                                                                                                                                                                                                                                 |

|  |                                                                                                                                                                                                                                                                                                                                                                                                                                                                                  |
|--|----------------------------------------------------------------------------------------------------------------------------------------------------------------------------------------------------------------------------------------------------------------------------------------------------------------------------------------------------------------------------------------------------------------------------------------------------------------------------------|
|  | <ul style="list-style-type: none"><li>#2 ketogenic diet</li><li>#3 exercise</li><li>#4 training</li><li>#5 HIIT</li><li>#6 aerobic capacity</li><li>#7 VO<sub>2</sub>max</li><li>#8 respiration</li><li>#9 #1 and #3</li><li>#10 #1 and #4</li><li>#11 #1 and #5</li><li>#12 #1 and #6</li><li>#13 #1 and #7</li><li>#14 #1 and #8</li><li>#15 #2 and #3</li><li>#16 #2 and #4</li><li>#17 #2 and #5</li><li>#18 #2 and #6</li><li>#19 #2 and #7</li><li>#20 #2 and #8</li></ul> |
|--|----------------------------------------------------------------------------------------------------------------------------------------------------------------------------------------------------------------------------------------------------------------------------------------------------------------------------------------------------------------------------------------------------------------------------------------------------------------------------------|
